# Supplementary material for: Integrating and maintaining automated external defibrillators and emergency planning in community sport settings: a qualitative case study
Source: PubMed Central journal article supplement — Emerg Med J. 2020 Jun 16;37(10):617–22. doi: 10.1136/emermed-2019-208781 (PMC7525771; doi:10.1136/emermed-2019-208781), 2020-06-16
Supplement: emermed-2019-208781supp002.pdf [file emermed-2019-208781supp002.pdf]

1 **Supplement 2**

2

|                                                    |  |
|----------------------------------------------------|--|
| <b>Code number allocated to the club/facility:</b> |  |
|----------------------------------------------------|--|

3

4 **Date:** \_\_\_\_\_

5

| <b>Aspect</b>                                                                           | <b>Yes</b> | <b>No</b> | <b>Unsure or n/a</b> |
|-----------------------------------------------------------------------------------------|------------|-----------|----------------------|
| Is the AED publicly accessible at all times?                                            |            |           |                      |
| Is the AED located so that it is easily accessible from all areas of the club/facility? |            |           |                      |
| Is the AED signage visible externally?                                                  |            |           |                      |
| Is the AED accompanied by a medical emergency plan / instructions?                      |            |           |                      |

6

7

8 What format is the medical emergency plan or instructions presented in? (Poster etc)

9

10 \_\_\_\_\_

11

12 Other comments or observations: (map drawn on back of page)

13 (e.g. distance to location of sports play, spectators, etc; working order; stored with the necessary equipment)

14

15 \_\_\_\_\_

16

17 \_\_\_\_\_

18

19 \_\_\_\_\_

20

21 Photographs taken? (Please circle): yes / no

22

23 \_\_\_\_\_

24

25 \_\_\_\_\_

26

27 **Questionnaire adapted from:**

28

29 Haskell SE, Post M, Cram P & Atkins DL. 2009. Community public access sites: compliance with American Heart Association recommendations. *Resuscitation*, 80(8):854-858.30 Huig IC, Boonstra L, Gerritsen PC & Hoeks SE. 2014. The availability, condition and employability of automated external defibrillators in large city centres in the Netherlands. *Resuscitation*, 85(10):1324-1329.32 Yoon CG, Jeong J, Kwon IH & Lee JH. 2016. Availability and use of public access defibrillators in Busan Metropolitan City, South Korea. *SpringerPlus*, 5(1):1524.

34

35

36
